# Supplementary material
Source: publisher site journal article supplement (https://www.dovepress.com/article/288186)
Supplement: Supplementary file 1 [file get_supplementary_file.php]

**Additional files**

**Table s1:** PRISMA Checklist

| **Section/topic** | | | **#** | | | **Checklist item** | | **Reported on page #** |
| --- | --- | --- | --- | --- | --- | --- | --- | --- |
| **TITLE** | | | | | | | |  |
| Title | | | **1** | | | Knowledge, Attitude and Practice towards COVID-19 in Ethiopia: A systematic Review, 2020 | | **1** |
| **ABSTRACT** | | | | | | | |  |
| Structured summary | | | **2** | | | Abstracts **Background:** Novel corona virus disease is an emerging respiratory disease. Worldwide this problem is becoming a public health emergency. Despite that, the control of this pandemic has remained unattainable in the developed as well as developing countries including Ethiopia. However, a systematic review of the knowledge, attitude and practice towards corona virus disease in Ethiopia was not previously done. Thus, the main aim of this systematic review was to estimate the status of knowledge, attitude and practice towards corona virus disease preventive measures in Ethiopia, 2020.  **Method:** Data was extracted based on the Preferred Reporting Items for Systematic Reviews and Meta-Analyses guidelines. Studies were accessed through electronic web-based search from PubMed, Cochrane Library, Google, Google Scholar, and Embase. All statistical analyses were done using Stata version 11 soft ware with a random-effects model.  **Result:** A total of 11 studies with 3818 participants were included in this systematic review and the overall estimated prevalence of the knowledge, attitude and practice towards coronavirus in Ethiopia were 61.78 %, 72.39 %, and 52.83 % respectively. According to subgroup analysis, the most estimated status of the knowledge, attitude and practice based on study area were 74% in Tigray, 86.13 % in Southern nation, nationalities and Peoples’ of region and 72 % in Tgray. Again, subgroup analysis was done based on the focused group and way of questionnaire administrations.  **Conclusion:** This systematic review revealed that knowledge, attitude and practice towards corona virus disease preventive measures were relatively more than half. However, government and every individuals should address those behaviors that stipulated by the World Health Organization and Center for Communicable Disease and Control guidelines to prevent corona virus disease.  **Keywords: -** Knowledge, Attitude, Practice, corona virus disease, Ethiopia | | **2** |
| **INTRODUCTION** | | | | | | | |  |
| Rationale | | **3** | | | | The aim this systematic review was to estimate the status of the knowledge, attitude and practice towards COVID-19 prevention measures among people in the community. | | **4** |
| Objectives | | **4** | | | | 1. What are the estimated prevalence status of the knowledge, attitude, and practice towards COVID-19 preventive measures? | | **5** |
| **METHODS** | | | | | | | |  |
| Protocol and registration | **5** | | | The protocol for this systematic review has been requested for registered in PROSPERO 2020 with PROSPERO acknowledgement of receipt number [224089]. It is on process to be registered. | | | | **-** |
| Eligibility criteria | **6** | | | The studies were included in this systematic review if and only: they met the following criteria: (1) participants all adults aged ≥ 18, (2) studies that clearly reported the proportion of knowledge, attitude and practice on CVID-19 preventive measures, (3) studies conducted in Ethiopia, (4) cross-sectional observational studies, and (5) both published and unpublished including pre-print studies at any time. The field was limited to “title/abstract’’, and those studies with no clear report of the outcome, program evaluation studies, studies done outside of the Ethiopia, letter to editors, case reports, study protocols, reviews, interventional studies, and citations without full text were excluded from the review. The PRISMA flow chart for the selection of studies is shown in Figure 1.  **Study selection and quality assessment**  All the retrieved studies were exported to Endnote version 7 (Thomason Reuters, London) reference manager and duplicated studies were carefully removed. Two investigators (BGY and HKA) independently screened the titles and abstracts which were followed by a full-text review to determine the eligibility of each study. The disagreement was solved by consensus with presence of third investigator CKM.  The quality of each study was evaluated by using Joanna Briggs Institute (JBI) quality appraisal criteria adapted for studies reporting prevalence data and cross-sectional studies.[27](#_ENREF_27) Papers which score five and above out of a total of nine scores were involved in the final a systematic review. | | | | **6 & 7** |
| Information sources | **7** | | | The preferred reporting Items for systematic Reviews and Meta-analysis (PRISMA) guideline were used to report the result of this systematic reviews and Meta-analysis (Table s1). We searched through PubMed, Cochrane Library, Google, Google Scholar, and Embase database for all available studies from June 01 to August 30, 2020 using Medical Subject Headings (MeSH) and free-text terms. The detailed search strategy is presented in an additional table file (Table s2). In this systematic Reviews the search starting was developed using “AND” and “OR”. The gray literatures were also searched from Ethiopian’s Universities research repository online library. In addition, a manual search of the references lists included was performed so as to address all evidences. We defined the participants, exposure, comparator, outcome(s), and type of study “PECO (T)”. The PECO (T) statement provides the framework for the identification and selection of studies for inclusion.[26](#_ENREF_26) As we were looking for prevalence studies, we only considered participants and the outcomes. | | | | **6** |
| Study selection | **9** | | | A total of 1410 studies were identified with this literature review (figure 1). We added three gray literatures that were not found in the search. Of these studies, 40 articles where duplicated records which had identified and removed. Reviewing of titles and abstracts resulted in the exclusion of 1340 irrelevant articles. Among them 801 and 539 articles were irrelevant and commentary literatures respectively. After assessing the full texts of the remaining 30 articles, additional 19 were excluded (8, 6 & 5 articles are due to poor quality, do not report the outcome of interest, and done outside of the Ethiopia). Then, a total of 11 unique studies were eligible and enrolled for final review analysis respectively. | | | | **9 and Fig 1** |
| Data collection process | **10** | | | All the retrieved studies were exported to Endnote version 7 (Thomason Reuters, London) reference manager and duplicated studies were carefully removed. Two investigators (BGY and HKA) independently screened the titles and abstracts which were followed by a full-text review to determine the eligibility of each study. The disagreement was solved by consensus with presence of third investigator CKM.  The quality of each study was evaluated by using Joanna Briggs Institute (JBI) quality appraisal criteria adapted for studies reporting prevalence data and cross-sectional studies.[27](#_ENREF_27) Papers which score five and above out of a total of nine scores were involved in the final a systematic review.  **Data extraction**  Data were independently extracted by two authors (BGY and HKA) using standardized data extraction format that developed according to 2014 Joanna Briggs Institute Reviewers’ Manual.[28](#_ENREF_28) The tool includes authors, study year, region, and study design, sample size and the proportion of knowledge, attitude and practice about CVID-19 prevention in Ethiopia. Articles that fulfilled the predefined criteria were used as a source of data for the final analysis. The two independent reviewers (BGY and HKA) extracted the data by using Excel spread sheet and cross checked to insure consistency. Any discrepancy was solved through discussion with presence of third author (CKM) and repeating the procedure to overcome the difference occurred during extracting each single study. The information regarding author, year of publication, study design, sample size, proportion/prevalence of KAP were extracted. | | | | **7 & 8** |
| Data items | **11** | | | The primary outcome of this systematic review was: - estimating status of the knowledge, attitude, and practice towards COVID-19 preventive measures presented as a percentage of the overall participants in Ethiopia. | | | | **5** |
| Risk of bias in individual studies | **12** | | | The overall status of the knowledge, attitude, and practice was estimated using a random effect model. Subgroup analysis was done based regional location in the country to adjust the variation in the estimate status of the KAP towards COVID-19. STATA version 11 (Stata Corp, College Station, TX, USA) statistical software was used for all statistical analysis. The Begg and Egger’s weighted regression method were used to detect evidence of publication bias. The p-value of ≤ 0.05 was considered as presence of significant publication bias.. | | | | **8** |
| Summary measures | **13** | | | Table 2: Characteristics of studies included in a systematic Review of the prevalence of Knowledge, Attitude and Practice towards COVID-19 in Ethiopia, 2020 | | | | **9 and Table 1** |
| Synthesis of results | **14** | | | The percentage of total variation across studies due to heterogeneity was assessed by using I2 statistics.[29](#_ENREF_29) The value of I2, 25, 50, and 75% represented low, moderate, and high heterogeneity respectively. A p-value less than 0.05 were used to declare heterogeneity. For the test result which indicates the presence of heterogeneity, random effect model was used as a method of analysis, since it reduces the heterogeneity of studies.[30](#_ENREF_30) Funnel plot and Egger’s regression test was done to check whether publication bias exists or not across studies.[31](#_ENREF_31) Visual examination of funnel plot asymmetry, Begg-Mazumdar Rank correlation tests and Egger’s regression tests were utilized to check for publication bias.[31](#_ENREF_31) | | | | **8** |
| Risk of bias across studies | **15** | | | Funnel plot and Egger’s regression test was done to check whether publication bias exists or not across studies.[31](#_ENREF_31) Visual examination of funnel plot asymmetry, Begg-Mazumdar Rank correlation tests and Egger’s regression tests were utilized to check for publication bias.[31](#_ENREF_31) | | | | **8** |
| Additional analyses | **16** | | | The result indicated that, no single study unduly influenced the overall estimate of knowledge, attitude and practice towards COVID-19. | | | | **13** |
| RESULTS | | | | | | | |  |
| Study selection | | | | | **17** | | A total of 11 studies with 3818 participants included in this a systematic review. Those had summarized in (Table1). | **9** |
| Study characteristics | | | | | **18** | | A total of 11 studies with 3818 participants included in this a systematic review. Those had summarized in (Table1). The studies had conducted from March 02 to June 20, 2020 in different regions of the country. Of those 11 studies, four of them [11](#_ENREF_11),[16](#_ENREF_16),[17](#_ENREF_17),[20](#_ENREF_20) were from multicenter, two studies [10](#_ENREF_10),[15](#_ENREF_15) were from Amhara region, three of them [19](#_ENREF_19),[21](#_ENREF_21),[23](#_ENREF_23) were SNNPR, one study [18](#_ENREF_18) was from Oromia region, and one study [22](#_ENREF_22) was from Tigray region. Having these, all studies enrolled in this a systematic review were cross-sectional studies (Table1). | **9 and table 1.** |
| Risk of bias within studies | | | | | **19** | | The presence of publication bias was assessed with funnel plots and tests. In this a systematic review funnels plots and tests, evidence of publication bias for knowledge, attitude and practice towards COVI-19 stated as follows. For knowledge, each articles effect size were allocated against the standard error and visual inspection of the funnel plot suggests asymmetry, as six studies lay on the right side and four studies on the left side of the line representing the pooled status (Figure s10) and this corrected by filling (Figure s11). The output of the publication bias by Eggers was not showing significant evidence of bias (p value=0.907). For attitude, each articles effect size were not allocated against the standard error and visual inspection of the funnel plot suggests symmetry, as two studies lay on the right side, two study lay at the middle, and two studies on the left side of the line representing the pooled status (Figure s12). The output of the publication bias by Eggers test was not showing significant evidence of bias (p value=0.658). Lastly, each articles for practice towards COVID-19 effect size were allocated against the standard error and visual inspection of the funnel plot suggests asymmetry, as five studies lay on the right side, one study lay at the middle, and one studies lay on the left side of the line representing the pooled prevalence (Figure s13) and this corrected by filling (Figure s14). The output of the publication bias by Eggers tests was not showing evidence of bias (p value=0.234). | **12** |
| Results of individual studies | | | | | **20** | | A total of 1410 studies were identified with this literature review (figure 1). We added three gray literatures that were not found in the search. Of these studies, 40 articles where duplicated records which had identified and removed. Reviewing of titles and abstracts resulted in the exclusion of 1340 irrelevant articles. Among them 801 and 539 articles were irrelevant and commentary literatures respectively. After assessing the full texts of the remaining 30 articles, additional 19 were excluded (8, 6 & 5 articles are due to poor quality, do not report the outcome of interest, and done outside of the Ethiopia). Then, a total of 11 unique studies were eligible and enrolled for final review analysis respectively. | **9** |
| Synthesis of results | | | | | **21** | | The estimated status using the fixed-effect model demonstrated significant heterogeneity between the studies. By random-effects model the pooled prevalence of Knowledge, attitude and practice towards COVID-19 reported by the 10, 6 and 7 studies were 61.78 % (95 % CI (48.97 %, 74.58 %)), 72.39 % (95 % CI (54.02 %, 90.77 %)), and 52.83 % (95 % CI (39.26, 66.41 %)) with significant heterogeneity between studies (I2= 99.1 %, p ≤0.001) and (I2= 98.6 %, p ≤0.001), (I2= 90.9 %, p ≤0.001) respectively (Figure 2, Figure 3 & Figure 4). By random-effects model the pooled prevalence of Knowledge, attitude and practice towards COVID-19 reported by the 10, 6 and 7 studies were 61.78 % (95 % CI (48.97 %, 74.58 %)), 72.39 % (95 % CI (54.02 %, 90.77 %)), and 52.83 % (95 % CI (39.26, 66.41 %)) with significant heterogeneity between studies (I2= 99.1 %, p ≤0.001) and (I2= 98.6 %, p ≤0.001), (I2= 90.9 %, p ≤0.001) respectively (Figure 2, Figure 3 & Figure 4). | **9 & 10** |
| Risk of bias across studies | | | | | **22** | | Presence of publication bias was examined using funnel plots and tests (Egger’s and begs). | **11** |
| Additional analysis | | | | | **23** | | Subgroup analysis  Subgroup analysis for knowledge by focused group, methods of questionnaire administered and study area. That is to check the possible heterogeneity between studies. Of the 10 studies, the most estimated status of knowledge towards COVID-19 was among age group greater than 18 people 81.17% (67.26, 95.09), I2= 94.4 %, p≤0.001. Whereas, the least was among students 41.31 % (3.60, 91.02), I2=99.4 %, p≤ 0.001 (Figure s1). Furthermore, we performed a subgroup analysis by way of questionnaire administered since heterogeneity existed. Hence, the most estimated status of the knowledge was which performed by interviewer administered questionnaire (IAQ) 63.55 % (50.69, 76.42), I2=96.4 %, p≤ 0.001 and the least one was performed through online based 58.83 % (37.26, 80.43), I2=99.1 %, p≤ 0.001 (Figure s2).  Again, the heterogeneity is still existed. So, for the last we were performed the subgroup analysis based on the study area and no evidence of the heterogeneity that most and least prevalence was 74% (95 % CI: 69.78, 78.22), I2= 0%, and 41.3% (95 % CI: 35.16 %, 47.44 %), I2= 0% from Tigray and Oromia regions respectively (Figure s3).  Subgroup analysis for attitude towards COVID-19 by methods of questionnaire administered, focused group and study area. Of the 6 studies, the most estimated status of attitude towards COVID-19 was with self-administered questionnaire (SAQ) 80.92 % (53.78, 108.07), I2= 99.1 %, p≤0.001. Whereas, the least was with online based questionnaire administration 43.80 % (41.35, 46.25), I2= 0% (Figure s4). Furthermore, we performed a subgroup analysis by focused group since heterogeneity existed. Hence, the most estimated status of the attitude was among health care workers (HCW) 80.92 % (53.78, 108.07), I2=99.1 %, p≤ 0.001 and the least one was among students 56.60 % (51.78, 61.41) (Figure s5). For the last, we were performed the subgroup analysis based on the study area. Most prevalent was 86.13% (77.80, 94.09), I2= 94 %, p≤0.001 from SNNPR. Whereas the least was 56.60 % (51.79, 61.41) from Amhara Region with evidence of the heterogeneity (Figure s6).  Subgroup analysis for practices towards COVID-19 by methods of questionnaire administered, focused group and study area. Of the 7 studies, the most estimated prevalence of practice towards COVID-19 with SAQ was 67.81 % (59.48, 76.14), I2= 85.2 %, p≤0.001. Whereas, the least was with IAQ 45.86 % (16.97, 74.75), I2= 99.3%, p≤ 0.001 (Figure s7). Furthermore, we performed a subgroup analysis by focused group since heterogeneity existed. Hence, the most estimated prevalence of the practice was among HCW 72 % (67.68, 76.32), I2=85.2 %, p≤ 0.001 and the least was among age group greater than 18 people 31.53 % (8.99, 54.07), I2=99.2%, p≤0.001 (Figure s8). Finally, we were performed the subgroup analysis based on the study area. Most prevalent was 72 % (67.80, 76.32 **%**), I2=98.9 %, p≤0.001 from Tigray region and the least was from SNNPR 20 % (16.76, 23.24 %) with evidence of the heterogeneity (Figure s10). | **10 & 11** |
| **DISCUSSION** | | | | | | | |  |
| Summary of evidence | | **24** | | | | Ethiopia is one of the thirteen countries considered a top priority by WHO with respect to the need for epidemic response preparedness against COVID-19.[32](#_ENREF_32) In Ethiopia announced the occurrence of the first COVID-19 cases in 13th of March 2020.[33](#_ENREF_33) Since then, the number of cases has raised with over 73,332 confirmed cases and over 1,170 mortality.[34](#_ENREF_34) Thus, this knowledge, attitude, and practice study contributes to a better understanding of the current situation, obstacles, and solutions for policy formation by the decision-makers.  This review stated that the existing output of the 11 studies which were described the status of knowledge, attitude and practice towards COVID-19. Various studies have indicated that ranges from 20% to 90.3% in the prevalence of knowledge, attitude and practice towards COVID-19 in Ethiopia. The difference in the prevalence of knowledge, attitude and practice between each part of the country can be justified because of the presence of availability of resources, measurement tools, sample size, sampling technique, source of information, and designs. | | **14** |
| Limitations | | **25** | | | | First, the bias may be there because of the search was only by the English language. Secondly, the scarcity of data in some regions of Ethiopia may make a problem to generalize the findings. Finally, used tools for measuring knowledge, attitude, and practice are a quantitative. So, to focus on behavior change, qualitative work would be necessary. | | **16** |
| Conclusions | | **26** | | | | This systematic review revealed that the knowledge, attitude, and practice towards COVID-19 preventive measures were relatively more than half and not sufficient enough to combat this rapidly spreading virus. Health promotions through public education on COVID-19 preventive measures are highly recommended by government in collaboration with healthcare organizations and every individuals should address those behaviors stipulated by the WHO and CDC guidelines to prevent COVID-19. Furthermore, the nationwide studies are needed to understand the determinant factors for the knowledge, attitude, and practice towards COVID-19 preventive measures and done meta-analysis. | | **15 &16** |
| **FUNDING** | | | | | | | |  |
| Funding | | **27** | | | | Not applicable | | **16** |

Notes: PRISMA table adapted from Liberati A, Altman D, Tetzlaff J, et al. The PRISMA statement for reporting systematic reviews and meta-analyses of studies that evaluate health care interventions: explanation and elaboration. Journal of clinical epidemiology. 2009;62(10). Creative Commons.

**Table s2: Search strategies for the five databases, from June 01 to August 30, 2020**

**MEDLINE-Pub Med**

{(knowledge) OR attitude) OR perception [MeSH Terms]) OR belief [MeSH Terms]) AND practice [MeSH Terms]) AND corona virus [MeSH Terms]) OR corona virus infections [MeSH Terms]) OR novel corona virus [MeSH Terms]) OR covid-19 [MeSH Terms]) OR severe acute respiratory syndrome [MeSH Terms]) OR corona virus disease [MeSH Terms]) AND Ethiopia} = 80

**Embase**

(((‘Knowledge’/exp)) AND ((‘attitude’/exp OR ‘perception’/exp OR ‘belief’/exp OR ‘practice*)) AND ((‘coronavirus’/exp OR ‘coronavirus infections’/exp OR ‘novel coronavirus’/exp OR ‘covid-19’/exp OR ‘severe acute respiratory syndrome’/exp OR ‘coronavirus disease’/exp)) AND ((‘public’/exp)) AND ((‘Ethiopia’/exp)))= 34

**COCHRANE LIBRARY**

(Knowledge*) AND (Attitude* or "Perception" or Belief*) AND (Practice*) AND (COVID-19*) AND (Ethiopia)= 8

Search filters

Search Field: All Text

**Google scholar and Google**

Knowledge, Attitude, and Practice towards COVID-19 in Ethiopia.

= 1285 + 3 gray literature=1288

Search filters

Search Field: TITLE

Limit-to doc type: Articles or Conference Paper

Limit-to language: English

**Figure s1:** Subgroup analysis by way of questionnaire administration on the prevalence of knowledge towards COVID-19 preventive measures in Ethiopia, 2020

NOTE: Weights are from random effects analysis

.

.

.

Overall (I-squared = 99.1%, p ≤ 0.001)

**SAQ**

Abay Woday Tadesse et al10

Bedru Jemal et al11

Subtotal (I-squared = 96.8%, p ≤ 0.001)

Subtotal (I-squared = 99.1%, p ≤ 0.001)

Author

Henok Dagne et al17

Subtotal (I-squared = 99.6%, p ≤ 0.001)

Dagne Bahrey Tadesse et al22

**OLB**

Biruk Wogayehu et al23

Daniel Bekele et al16

Yohannes Kebede et al18

Yonas Akalu et al15

Nurdin Nasir et al21

Edessa Negera et al20

**IAQ**

April 15-25,2020

April 15-25,2020

Year

March 25 to April 4, 2020

March to April,2020

March 14 to April 05, 2020

April 15-22, 202

March 20–28, 2020

March 02 to April 10, 2020

March 08 to April 08, 2020

May 20 to June 20, 2020

61.78 (48.97, 74.58)

69.60 (65.14, 74.06)

88.20 (85.03, 91.37)

63.55 (50.69, 76.42)

58.85 (37.26, 80.43)

ES (95% CI)

55.90 (51.66, 60.14)

62.44 (27.18, 97.69)

74.00 (69.78, 78.22)

25.00 (20.13, 29.87)

78.80 (74.46, 83.14)

41.30 (35.16, 47.44)

66.10 (61.48, 70.72)

76.50 (72.88, 80.12)

42.00 (39.56, 44.44)

100.00

9.99

10.05

39.89

30.08

Weight

10.00

30.03

10.00

9.97

10.00

9.88

9.98

10.03

10.08

%

61.78 (48.97, 74.58)

69.60 (65.14, 74.06)

88.20 (85.03, 91.37)

63.55 (50.69, 76.42)

58.85 (37.26, 80.43)

ES (95% CI)

55.90 (51.66, 60.14)

62.44 (27.18, 97.69)

74.00 (69.78, 78.22)

25.00 (20.13, 29.87)

78.80 (74.46, 83.14)

41.30 (35.16, 47.44)

66.10 (61.48, 70.72)

76.50 (72.88, 80.12)

42.00 (39.56, 44.44)

100.00

9.99

10.05

39.89

30.08

Weight

10.00

30.03

10.00

9.97

10.00

9.88

9.98

10.03

10.08

%

0

.1

1

10

NOTE: Weights are from random effects analysis

.

.

.

.

.

Overall (I-squared = 99.1%, p ≤ 0.001)

**Amhara**

Bedru Jemal et al11

**Multicenter**

Edessa Negera et al20

Biruk Wogayehu et al23

Subtotal (I-squared = .%, p = .)

**SNNPR**

Henok Dagne et al17

Author

**Tigray**

Daniel Bekele et al16

Subtotal (I-squared = .%, p = .)

**Oromia**

Subtotal (I-squared = 99.6%, p ≤ 0.001)

Yonas Akalu et al15

Nurdin Nasir et al21

Subtotal (I-squared = 99.5%, p ≤ 0.001)

Yohannes Kebede et a118

Dagne Bahrey Tadesse et al22

Subtotal (I-squared = 12.4%, p = 0.285)

Abay Woday Tadesse et al10

April 15-25,2020

May 20 to June 20, 2020

March 14 to April 05, 2020

March 25 to April 4, 2020

Year

April 15-22, 202

March 02 to April 10, 2020

March 08 to April 08, 2020

March 20–28, 2020

March to April,2020

April 15-25,2020

61.78 (48.97, 74.58)

88.20 (85.03, 91.37)

42.00 (39.56, 44.44)

25.00 (20.13, 29.87)

41.30 (35.16, 47.44)

55.90 (51.66, 60.14)

ES (95% CI)

78.80 (74.46, 83.14)

74.00 (69.78, 78.22)

50.78 (0.31, 101.25)

66.10 (61.48, 70.72)

76.50 (72.88, 80.12)

66.21 (42.45, 89.97)

41.30 (35.16, 47.44)

74.00 (69.78, 78.22)

67.90 (64.47, 71.33)

69.60 (65.14, 74.06)

100.00

10.05

10.08

9.97

%

9.88

10.00

Weight

10.00

10.00

20.00

9.98

10.03

40.13

9.88

10.00

19.98

9.99

61.78 (48.97, 74.58)

88.20 (85.03, 91.37)

42.00 (39.56, 44.44)

25.00 (20.13, 29.87)

41.30 (35.16, 47.44)

55.90 (51.66, 60.14)

ES (95% CI)

78.80 (74.46, 83.14)

74.00 (69.78, 78.22)

50.78 (0.31, 101.25)

66.10 (61.48, 70.72)

76.50 (72.88, 80.12)

66.21 (42.45, 89.97)

41.30 (35.16, 47.44)

74.00 (69.78, 78.22)

67.90 (64.47, 71.33)

69.60 (65.14, 74.06)

100.00

10.05

10.08

9.97

%

9.88

10.00

Weight

10.00

10.00

20.00

9.98

10.03

40.13

9.88

10.00

19.98

9.99

0

.1

1

10

Figure s2: Subgroup analysis by study location on the prevalence of knowledge towards COVID-19 in Ethiopia, 2020

NOTE: Weights are from random effects analysis

.

.

.

Overall (I-squared = 99.6%, p ≤ 0.001)

Subtotal (I-squared = 99.1%, p ≤0.001)

Dagne Bahrey Tadesse et al22

Nurdin Nasir et al21

**IAQ**

Bedru Jemal et al11

**OLB**

Author

Subtotal (I-squared = .%, p = .)

Subtotal (I-squared = 98.7%, p ≤0.001)

Edessa Negera et al20

Simeneh Mola et al19

Abay Woday Tadesse et al10

**SAQ**

March to April,2020

March 08 to April 08, 2020

April 15-25,2020

Year

May 20 to June 20, 2020

March 27 to 31, 2020

April 15-25,2020

72.39 (54.02, 90.77)

80.92 (53.78, 108.07)

67.00 (62.48, 71.52)

81.80 (78.51, 85.09)

94.70 (92.50, 96.90)

ES (95% CI)

43.80 (41.35, 46.25)

76.35 (59.48, 93.23)

43.80 (41.35, 46.25)

90.30 (87.90, 92.70)

56.60 (51.79, 61.41)

100.00

33.32

16.60

16.67

16.72

Weight

16.71

49.97

16.71

16.72

16.57

%

%

0

.1

1

10

Figure s3: Subgroup analysis of attitudes towards COVID-19 by way of questionnaire administration in Ethiopia, 2020

NOTE: Weights are from random effects analysis

.

.

.

Overall (I-squared = 99.6%, p ≤0.001)

**Student**

Subtotal (I-squared = 99.1%, p ≤0.001)

Author

Bedru Jemal et al11

Edessa Negera et al20

Simeneh Mola et al19

Dagne Bahrey Tadesse et al22

Nurdin Nasir et al21

**HCW**

Abay Woday Tadesse et al10

Subtotal (I-squared = .%, p = .)

Subtotal (I-squared = 99.7%, p ≤ 0.001)

**Age >18**

Year

April 15-25,2020

May 20 to June 20, 2020

March 27 to 31, 2020

March to April,2020

March 08 to April 08, 2020

April 15-25,2020

72.39 (54.02, 90.77)

80.92 (53.78, 108.07)

ES (95% CI)

94.70 (92.50, 96.90)

43.80 (41.35, 46.25)

90.30 (87.90, 92.70)

67.00 (62.48, 71.52)

81.80 (78.51, 85.09)

56.60 (51.79, 61.41)

56.60 (51.79, 61.41)

71.96 (41.78, 102.14)

100.00

33.32

Weight

16.72

16.71

%

16.72

16.60

16.67

16.57

16.57

50.11

ES (95% CI)

Weight

%

0

.1

1

10

Figure s4: Subgroup analysis of attitudes towards COVID-19 by focused group in Ethiopia, 2020

NOTE: Weights are from random effects analysis

.

.

.

.

Overall (I-squared = 99.6%, p ≤ 0.001)

Bedru Jemal et al11

Nurdin Nasir et al21

Edessa Negera et al20

Subtotal (I-squared = 94.0%, p ≤ 0.001)

Dagne Bahrey Tadesse et al22

**Tigray**

Abay Woday Tadesse et al10

Author

**Multicenter**

Subtotal (I-squared = 99.9%, p ≤0.001)

**SNNPR**

Simeneh Mola et al19

Subtotal (I-squared = .%, p = .)

**Amhara**

Subtotal (I-squared = .%, p = .)

April 15-25,2020

March 08 to April 08, 2020

May 20 to June 20, 2020

March to April,2020

April 15-25,2020

Year

March 27 to 31, 2020

72.39 (54.02, 90.77)

94.70 (92.50, 96.90)

81.80 (78.51, 85.09)

43.80 (41.35, 46.25)

86.13 (77.80, 94.46)

67.00 (62.48, 71.52)

56.60 (51.79, 61.41)

ES (95% CI)

69.25 (19.37, 119.13)

90.30 (87.90, 92.70)

56.60 (51.79, 61.41)

67.00 (62.48, 71.52)

100.00

16.72

16.67

16.71

33.39

16.60

16.57

Weight

33.44

16.72

%

16.57

16.60

72.39 (54.02, 90.77)

94.70 (92.50, 96.90)

81.80 (78.51, 85.09)

43.80 (41.35, 46.25)

86.13 (77.80, 94.46)

67.00 (62.48, 71.52)

56.60 (51.79, 61.41)

ES (95% CI)

69.25 (19.37, 119.13)

90.30 (87.90, 92.70)

56.60 (51.79, 61.41)

67.00 (62.48, 71.52)

100.00

16.72

16.67

16.71

33.39

16.60

16.57

Weight

33.44

16.72

%

16.57

16.60

0

.1

1

10

Figure s5: Subgroup analysis of attitudes towards COVID-19 by study location in Ethiopia, 2020

NOTE: Weights are from random effects analysis

.

.

.

Overall (I-squared = 98.9%, p ≤0.001)

Dagne Bahrey Tadesse et al22

Author

Subtotal (I-squared = 85.2%, p = 0.009)

Abay Woday Tadesse et al10

Bedru Jemal et al11

Henok Dagne et al17

Simeneh Mola et al19

Subtotal (I-squared = 99.3%, p ≤ 0.001)

**SAQ**

Edessa Negera et al20

Subtotal (I-squared = 94.8%, p ≤ 0.001)

Yonas Akalu et al15

**IAQ**

**OLB**

March to April,2020

Year

April 15-25,2020

April 15-25,2020

March 25 to April 4, 2020

March 27 to 31, 2020

May 20 to June 20, 2020

March 02 to April 10, 2020

52.83 (39.26, 66.41)

72.00 (67.68, 76.32)

ES (95% CI)

67.81 (59.48, 76.14)

65.00 (60.37, 69.63)

63.50 (58.76, 68.24)

54.00 (49.75, 58.25)

20.00 (16.76, 23.24)

45.86 (16.97, 74.75)

43.00 (40.55, 45.45)

48.36 (37.58, 59.13)

52.70 (47.83, 57.57)

100.00

14.27

Weight

28.50

14.24

14.23

14.28

14.36

42.81

14.41

28.69

%

14.21

ES (95% CI)

100.00

14.27

Weight

28.50

14.23

14.28

14.36

42.81

14.41

28.69

%

14.21

0

.1

1

10

Figure s6: Subgroup analysis of practice towards COVID-19 by way of questionnaire administration in Ethiopia, 2020

NOTE: Weights are from random effects analysis

.

.

.

.

.

Overall (I-squared = 98.9%, p ≤ 0.001)

Subtotal (I-squared = .%, p = .)

**Patients**

Bedru Jemal et al11

**Age >18**

Subtotal (I-squared = 99.2%, p ≤ 0.001)

Subtotal (I-squared = .%, p = .)

Subtotal (I-squared = .%, p = .)

Dagne Bahrey Tadesse et al22

**HCW**

Edessa Negera et al20

**EP**

Henok Dagne et al17

Yonas Akalu et al15

Author

Subtotal (I-squared = 85.2%, p = 0.009)

Simeneh Mola et al19

Abay Woday Tadesse et al10

**Student**

April 15-25,2020

March to April, 2020

May 20 to June 20, 2020

March 25 to April 4, 2020

March 02 to April 10, 2020

Year

March 27 to 31, 2020

April 15-25,2020

52.83 (39.26, 66.41)

65.00 (60.37, 69.63)

63.50 (58.76, 68.24)

31.53 (8.99, 54.07)

52.70 (47.83, 57.57)

54.00 (49.75, 58.25)

72.00 (67.68, 76.32)

43.00 (40.55, 45.45)

54.00 (49.75, 58.25)

52.70 (47.83, 57.57)

ES (95% CI)

67.81 (59.48, 76.14)

20.00 (16.76, 23.24)

65.00 (60.37, 69.63)

100.00

14.24

14.23

%

28.77

14.21

14.28

14.27

14.41

14.28

14.21

Weight

28.50

14.36

14.24

52.83 (39.26, 66.41)

65.00 (60.37, 69.63)

63.50 (58.76, 68.24)

31.53 (8.99, 54.07)

52.70 (47.83, 57.57)

54.00 (49.75, 58.25)

72.00 (67.68, 76.32)

43.00 (40.55, 45.45)

54.00 (49.75, 58.25)

52.70 (47.83, 57.57)

ES (95% CI)

67.81 (59.48, 76.14)

20.00 (16.76, 23.24)

65.00 (60.37, 69.63)

100.00

14.24

14.23

%

28.77

14.21

14.28

14.27

14.41

14.28

14.21

Weight

28.50

14.36

14.24

0

.1

1

10

Figure s7: Subgroup analysis of practice towards COVID-19 by study group in Ethiopia, 2020

NOTE: Weights are from random effects analysis

.

.

.

.

Overall (I-squared = 98.9%, p = 0.000)

Subtotal (I-squared = .%, p = .)

Henok Dagne et al17

Subtotal (I-squared = 92.2%, p ≤0.001)

Subtotal (I-squared = .%, p = .)

**Tigray**

Author

Edessa Negera et al20

**Amhara**

Simeneh Mola et al19

Dagne Bahrey Tadesse et al22

**SNNPR**

Abay Woday Tadesse et al10

Yonas Akalu et al15

Subtotal (I-squared = 96.9%, p ≤ 0.001)

Bedru Jemal et al11

**MC**

March 25 to April 4, 2020

Year

May 20 to June 20, 2020

March 27 to 31, 2020

March to April,2020

April 15-25,2020

March 02 to April 10, 2020

April 15-25,2020

52.83 (39.26, 66.41)

20.00 (16.76, 23.24)

54.00 (49.75, 58.25)

58.87 (46.82, 70.93)

72.00 (67.68, 76.32)

ES (95% CI)

43.00 (40.55, 45.45)

20.00 (16.76, 23.24)

72.00 (67.68, 76.32)

65.00 (60.37, 69.63)

52.70 (47.83, 57.57)

53.37 (41.13, 65.62)

63.50 (58.76, 68.24)

100.00

14.36

14.28

28.45

14.27

Weight

14.41

%

14.36

14.27

14.24

14.21

42.92

14.23

ES (95% CI)

Weight

%

0

.1

1

10

Figure s8: Subgroup analysis of practice towards COVID-19 by study area in Ethiopia, 2020

Figure s9: Funnel plots to test the publication bias of the 10 studies on knowledge towards COVID-19 in Ethiopia, 2020

Figure s10: Fill and trill on knowledge

Figure s11: Funnel plots to test the publication bias of the 6 studies on attitudes towards COVID-19 in Ethiopia, 2020

Figure s12: Funnel plots to test the publication bias of the 7 studies on practice towards COVID-19 in Ethiopia, 2020

Figure s13: Fill and Trill on practice
